# Supplementary material for: A high-performance, all-solid-state Na+ selective sensor printed with eco-friendly conductive ink
Source: Royal Society of Chemistry journal article supplement (doi:10.1039/d3ra01410j), 2023-01-01
Supplement: d3ra01410j1.pdf [file d3ra01410j1.pdf]

**Table S1.** ingredient table of the ink

| Composition                   | Mass |
|-------------------------------|------|
| Graphite                      | 60g  |
| CB                            | 30g  |
| BYK-022                       | 3g   |
| T-859                         | 6g   |
| Waterborne polyurethane resin | 87g  |
| Deionized water               | 114g |

**Table S2.** Na<sup>+</sup>-ISSs in some literature

| Sensor                                     | Analyte                          | Nanomaterial         | LOD (M)          | Slope (mV/dec) | Drift (mV/h) |
|--------------------------------------------|----------------------------------|----------------------|------------------|----------------|--------------|
| V-AuNW electrodes <sup>42</sup>            | Na <sup>+</sup>                  | V-AuNW               | 10 <sup>-3</sup> | 58.2           | 2.2          |
| Paper-based electrode <sup>43</sup>        | Na <sup>+</sup>                  | Graphene             | 10 <sup>-6</sup> | 55.7           | 0.18         |
| PVC-based surfactant sensors <sup>44</sup> | Na-SDS                           | Plasticisers         | 10 <sup>-6</sup> | 46.4~66.3      | 0.4~1.2      |
| Flexible ISE <sup>45</sup>                 | Na <sup>+</sup> , K <sup>+</sup> | Hydrogel electrolyte | 10 <sup>-3</sup> | < 50           | —            |
| SPE <sup>1</sup>                           | Na <sup>+</sup>                  | CB                   | 10 <sup>-4</sup> | 58             | 0.6          |
| OECT with PSSNa electrolyte <sup>46</sup>  | Na <sup>+</sup> , K <sup>+</sup> | OECTs                | 10 <sup>-5</sup> | 84             | —            |
| This work                                  | Na <sup>+</sup>                  | Graphite/CB          | 10 <sup>-4</sup> | 75.72          | 0.28         |

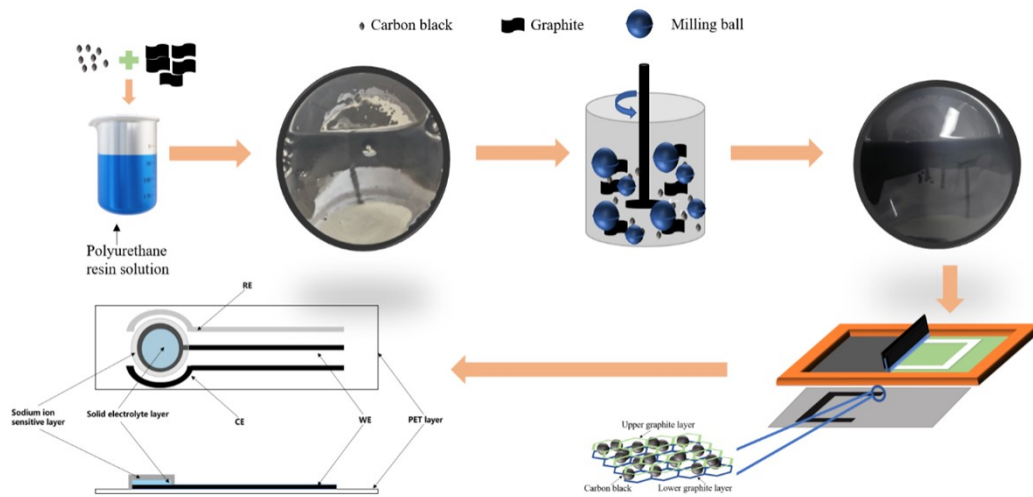

**Fig S1.** Work flow chart

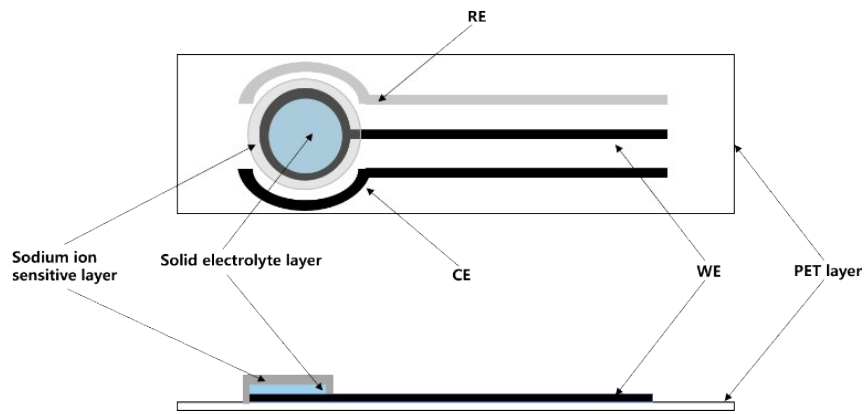

**Fig S2.** Structure of ASS-Na<sup>+</sup>ISS

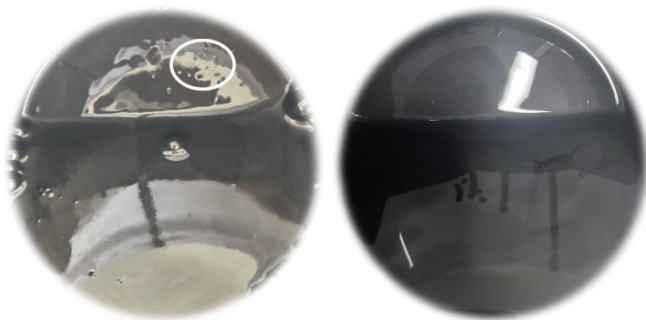

**Fig S3.** Ball milling causes the disappearance of large particles in the ink. (left) Before ball milling; (right) After ball milling.

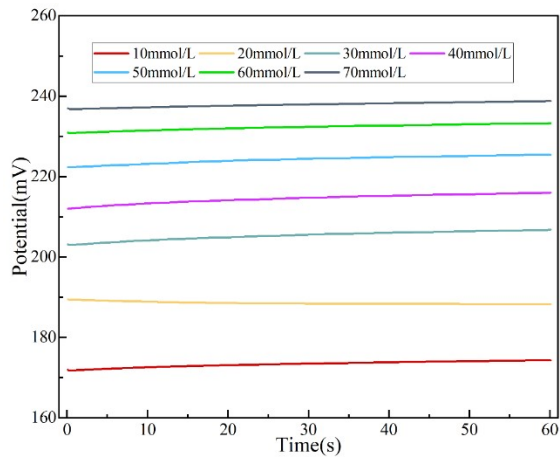

**Fig S4.** EMF-Time response curves of ASS-Na<sup>+</sup>-ISS

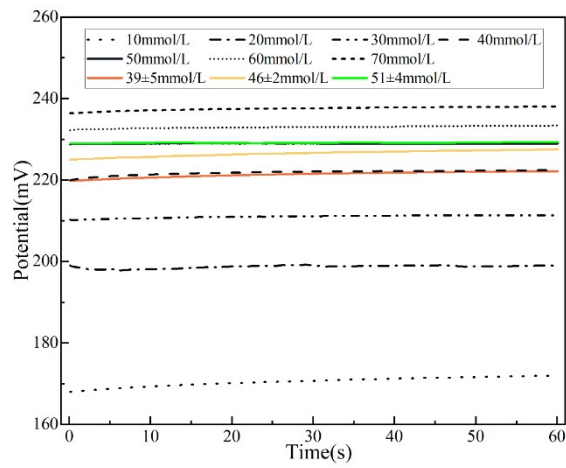

**Fig S5.** EMF-Time response curves obtained from testing human sweat samples
